# Supplementary material
Source: PubMed Central journal article supplement (PMC4811732)
Supplement: NIHMS754396-supplement-2.pdf [file NIHMS754396-supplement-2.pdf]

**Supplementary Table 1: RNAi targets and primer sequences**

| <b>Primer</b>                  | <b>Target sequence</b>  |                             |
|--------------------------------|-------------------------|-----------------------------|
| Human <i>NUP93</i> , siRNA #9  | CGGCAGAUGUCAAGGCGUC     |                             |
| Human <i>NUP93</i> , siRNA #10 | GCUCAAGGAAUAAGCGCAA     |                             |
| Human <i>NUP93</i> , siRNA #11 | AGAGUGAAGUGGGCGGACAA    |                             |
| Human <i>NUP93</i> , shRNA #1  | GCAAGTGAAACAGCGAATTCT   |                             |
| Human <i>NUP93</i> , shRNA #3  | GGACTCCACGTTCTATCTTCT   |                             |
|                                |                         |                             |
| <b>Primer</b>                  | <b>Forward sequence</b> | <b>Reverse sequence</b>     |
| NUP93_ex2                      | TTGAAACCTGTCTTTCCCTTG   | TTCAAGGCAGGAAAGAAGAAAC      |
| NUP93_ex3                      | TCCAGGTGATGTCTATGGAAAG  | TATGCTCTGGGTTCCACCTG        |
| NUP93_ex4                      | GCTCCAGAATGGAAGAAAC     | CCCTCATCTGTATACATCTACATTTTG |
| NUP93_ex5                      | CCTGAGGGTCATTGTTCTCTG   | CAAATGCGGCATCCTAAAAG        |
| NUP93_ex6                      | ATCTCATGCCTGCTCTCTTC    | TGGCTTAATCCCCCTTAAAATC      |
| NUP93_ex7                      | CTCCGAGGAAGGAAAGGTTG    | ATTTCAACCAAATCGGCAAG        |
| NUP93_ex8                      | GGTCAGAGTGCCACAAAGAAC   | AGCACACCTAGCCTGAGGAC        |
| NUP93_ex9                      | TGCCCTTCCAAGCTACAGTG    | CTGCTCTGGGGGTGTAAGT         |
| NUP93_ex10                     | GGGGCTTAGCTCGTTTTAG     | GAAGGATGCCCTTTGATTC         |
| NUP93_ex11                     | GGCTTCCCTGCTTTTATGTG    | CTATGTGGGCAGGGGAAAC         |
| NUP93_ex12                     | CCCAGCTCATAACCATAGCC    | TGGACAAGAGAAGGGAAAGG        |
| NUP93_ex13                     | ACCAGTGAGCCCCTTCTTTC    | GGGACGTGCTGTGGTTAC          |
| NUP93_ex14                     | GGTTGTGACCCATTCTGACC    | CACTCACACAGCGCAGAAAC        |
| NUP93_ex15                     | ACCCGGAAGTTTGAGTCCAC    | GAAAACCATGGGGAGGAGAG        |
| NUP93_ex16                     | TTATCCCATTATCCCATTTG    | GGGCCATAATTTTCATTCC         |
| NUP93_ex17                     | TTTGGATCCTAATTGCTTCTCTG | GGGAGGGTGCTACAACAATG        |
| NUP93_ex18                     | GTTCTCTTTGGTGGGTAGGG    | CTTTGAAAGCTGTCTGCTG         |
| NUP93_ex19                     | AGGCTGGTCACTGACTCCTG    | CTGCACTTCAAACACCTTTCC       |
| NUP93_ex20                     | GAAGCCCTTTGGAGTATGTGAG  | CTGAAAGGGAACCACTCTGG        |
| NUP93_ex21                     | TGTTTCAGTGCCATCAGCTC    | ATGTTTCTCGGAATGCTG          |
| NUP93_ex22                     | ACCCATCAGGGATCTGTCC     | CCCATGTGCCTGATGTACTG        |

**Supplementary Table 1: RNAi targets and primer sequences (continued)**

| <b>Primer</b> | <b>Forward sequence</b>     | <b>Reverse sequence</b>   |
|---------------|-----------------------------|---------------------------|
| XPO5_ex2      | TTCTCTCTCTTGGAGATTGC        | CTCAGCCCTCGAAAGGAAAC      |
| XPO5_ex3      | GAAGTCACGCTTTGCCTAAAC       | TTTTGCCATTTCATTGACAG      |
| XPO5_ex4      | GAACAGGTTCAATTTGTTCTGTTTG   | CCCTGAAGTTTGTCCAAGG       |
| XPO5_ex5      | AAGATTAATCAAAAACACTCATATTGG | GCAACAGAAAATAGCCTTTGG     |
| XPO5_ex6      | AGGTCATGGCTGCAGTGAG         | TTCAAGGGCATTGATTTGTG      |
| XPO5_ex7      | CCCAAACCTTTAAATGACTTTCTG    | TGTTACCGAGGACTTCATGG      |
| XPO5_ex8      | CTTACAGAAGATGTCGGTACTTTG    | CAGGAGACGGAGGTTGTGG       |
| XPO5_ex9      | CAGGTTTTGCCACCAAATAAG       | AAATGGGCTTGAAGCTCTCC      |
| XPO5_ex10     | TTCTCTCCTGCTTTTCTCG         | CACTACGGTCATTCCCAAG       |
| XPO5_ex11     | CACAGGCTGGTCTCCAATC         | TCCAAATCCTTTGACGTTTTC     |
| XPO5_ex12     | CAGTGGGTCCACTTTTCATCC       | TCTGCAATGGGAAACTAGGG      |
| XPO5_ex13     | CTCTCCAGGATGAGCAAAGC        | TGATTCCTGTCCTTCCCTTG      |
| XPO5_ex14     | TCTGCGATCTTTCAATGCTG        | CATTTACAGCTGAGCAACAG      |
| XPO5_ex15     | TAAGTGGAGGCGACCATTG         | TGGGCAATGTAGCAAGATCC      |
| XPO5_ex17     | AGGGCATAACAAGAAACATGG       | CTACTTCAGCCAGGGTCCAG      |
| XPO5_ex18     | CCTTGAGTAAGCCACCTCTCC       | AACCAAAATGGGTGCTTGAG      |
| XPO5_ex19     | ACTCCCACGTTTCTACCAG         | GCCTGTAACTCCTGTGGAAG      |
| XPO5_ex20     | CATTCTCTCTGGCCTCTGTG        | AAACAACAGAGAAAAGCCATTATTC |
| XPO5_ex21     | AGGCAGGAAGACTGCTTGAG        | CTGCATCAGATGGAAAAGCTC     |
| XPO5_ex22     | TCACGTAGCCAATGCTTTG         | ATATGGAGAGGCAGCATTGG      |
| XPO5_ex23     | CTTCCAGTTCTGCCTCTTCC        | AGGGCTGGCAGTAACAGATG      |
| XPO5_ex24     | AAGCTCAGAAATGGCCAGAG        | CATCTGGCAAATCCTTTAGGG     |
| XPO5_ex25     | CATCAGGGATGTGGGATAGG        | TTCATCCACCAAGAAGAGTGG     |
| XPO5_ex26     | TCAGTGGATCACTGCTGTCC        | CCTTCATGGAGTTGGCTGAG      |
| XPO5_ex27     | AGACAGGTTGGGATCAGTGG        | GTATGATGGAGGCACACAGC      |
| XPO5_ex28     | ATGGGCATTATGTGGAGGTG        | CCTGGGCAAGGAGTAAAGG       |
| XPO5_ex29     | GGCAACAAAACAAACCCATC        | TCAGTCTGCATGACCCAAAC      |
| XPO5_ex30     | CCCATTCTCAGAGATTGCAC        | GGCCCTAAAGCACAGTTGTC      |
| XPO5_ex31     | GCCCATACACATGATTTAAGAAGG    | CTCAGCCCTCGAAAGGAAAC      |
| XPO5_ex32     | TGAGGGCCCAGCATTAAATTCT      | GTGGAAAGTGAGGTGGCAGT      |

**Supplementary Table 1: RNAi targets and primer sequences (continued)**

| Primer        | Forward sequence              | Reverse sequence              |
|---------------|-------------------------------|-------------------------------|
| NUP205_ex1    | GCAGATTCTGGAGCCTTTTG          | GCCCAGAATTAGGGAAAAGC          |
| NUP205_ex2_1  | AGATTA AAAAGTAGCTGTGGGTGTAAC  | GAAAATTTCTTACCGGATTTTTG       |
| NUP205_ex2_2  | GTGGGAAATGCTCTTTGGAG          | GCCAGAAGTCCAAGACAAGC          |
| NUP205_ex3    | AGGTAACACTTTGGGACCTTG         | TTTTGCATTATTTTACCACTGTTTC     |
| NUP205_ex4    | CCCCTTAAGCCCTGAGCTAC          | TTCAAATTAACCCCTGAAATCC        |
| NUP205_ex5    | GCGTTTGCTATACCTATTATTATGAAG   | TGTTTCTGCCTCTGAGATTTG         |
| NUP205_ex6_1  | TCAGAATTCAGAGGTGACG           | TGCATCCAGTGAGCCATTAG          |
| NUP205_ex6_2  | GGCTTGCCAGTCACCTTTAG          | TGCAAACACAGGAACAGAGC          |
| NUP205_ex7    | TGCTCAGATTTTCTGACTTTTGG       | TGCTGTTTCTCATAACAAAATTACC     |
| NUP205_ex8    | TGACTTTTCTCCATGTA CTGTG       | TTTTATTAGTTTTCCAAAACATAAAGCTG |
| NUP205_ex9    | CACTTTAAGACAGTTGCCTGATTTTC    | CTGAAATTTTCCAAAGTTAGGG        |
| NUP205_ex10   | CCTAACTTTGGAAAATTT CAGGTG     | TCATGTTTTCAAGACTCTCTATCACAG   |
| NUP205_ex11   | TCTTTATTAGCTAGTCCGTGTTGC      | GAACCTAGTTCAAACACCAATGTTTC    |
| NUP205_ex12   | TTTTAAATAAAAATTCTGTGCTGTTTTTC | TGTTTGGGGCTCTTAAAATG          |
| NUP205_ex13   | TGGAAAGTCTCATTCTTTTTGTG       | AAGCCCAACTTTCCACATTG          |
| NUP205_ex14   | GGTCCAGTGGGTGAGGTATG          | CAACACTGATCAGAAAACCCTTC       |
| NUP205_ex15   | TTTTATTACCAAGTTTTCTTTCTTTTTTC | CATGAATTTAGCACCATATACTTTTG    |
| NUP205_ex16   | AAGCAAAATGAATTGGGATTTTC       | TGACA ACTTGTGTTGAAAGTGACAG    |
| NUP205_ex17   | TGCTGTGTCTCTAAATTGAAACTTG     | GCTGTTTGCAAGACATGAAGG         |
| NUP205_ex18   | AAACTTGT CATTGTCTTGTTTTCC     | TTTACTTCATTTCTCTACCTACAAAGG   |
| NUP205_ex19   | CACCAAAAATTTTATCACTGTTCC      | TTCGTGGGTAGGTTTTACC           |
| NUP205_ex20   | CGTAAATACCTAAGCAGGTTTGC       | TCTCAATTCCTCTTACCCATCAC       |
| NUP205_ex21   | TGTAATTTTGTGTTGTGATTTCTGC     | TGACCCATCCATCACATTACC         |
| NUP205_ex22   | AATGCAGCAATTCTAAAAGAAAAG      | CGGATTTTATCCACAAATGAAAG       |
| NUP205_ex23   | TAGGTTGCCAAGGACTGTTTC         | TGTTCTTATAAATACGGGAAAATAATG   |
| NUP205_ex24   | TTGTTACATGGGAAAATATCTGTTG     | AAGCTTCAGATTTGTGCTTGTC        |
| NUP205_ex25   | GCACAGGGCTCTTTGATGTAG         | TTTCTATACCAGTTCAGAGTTTGGAG    |
| NUP205_ex26   | TCAACTGAATATGATGGCTTGC        | TCTGAGCCACTTGACACTGC          |
| NUP205_ex27   | AATATTTTGGTCTGGAAATTGG        | TTTTAGTCTTTTACCAGCAACC        |
| NUP205_ex28   | CCTTG TGATTCAATTCCTGTG        | CCCAATCGAAAATGGAAAAC          |
| NUP205_ex29_1 | CACTCTAATTTGCCCTTGTCC         | CCTGTCTTCAAATGAAGTCTAACAG     |
| NUP205_ex29_2 | TGTT CACTGACTGCTCACC          | CCACCACCTAGGGAGATTAGG         |
| NUP205_ex30   | AGTGGGTTTTGCTTCTATTGG         | AAGTAACCATCTCCCAATCCAG        |
| NUP205_ex31_1 | GTGGGCCTTTGTGTACAAGC          | CAAGCATCTCGACAGACCAC          |
| NUP205_ex31_2 | AGAAAACCATGTGGGAAAGG          | CAAGAAATCCACCCACCTTG          |
| NUP205_ex32   | TTGGTAGCATCTACATGTTTTGG       | CAGAATGTATGCCACATTAATTTTC     |
| NUP205_ex33   | CCCTTG GACATGATTT CAGC        | TGACAGGGGCACAGTATGAC          |
| NUP205_ex34   | GGAATGTTTTCTCCTTGTTTGG        | CTCTGCCACAACATTAGGAC          |
| NUP205_ex35   | TTTCTATTCTCTTCTTTTCAATG       | GGCTCTGTTAGCAGTACCAATTTTC     |
| NUP205_ex36   | AACAGGTA CTTACAGTCTTTGTAAAATC | TGGGGAGGATGGTATATTTTG         |
| NUP205_ex37   | GCCTTAAGGACTGATTCCATTC        | TAAAACCTTAGAGAAGTCACATGG      |
| NUP205_ex38   | CTTCAAATCTCGATTTTCATGC        | AAAAGAAAATACTGCATCTTACTGG     |
| NUP205_ex39   | GGAACATTGTTTTATGTCATCACC      | CACAGAAGAATCATTCCAATTCC       |
| NUP205_ex40   | CATTTATCATGGTGACCTGCTG        | TCTCCTTCCACCTGGTTTTG          |
| NUP205_ex41   | TTCTTCTCCTCCGAAACTGG          | AGCTCTTGATTCACCCAATTC         |
| NUP205_ex43   | AGTATTTACATTGAAAGAACCACATTAC  | GGAGACAATTCTCCCAATTC          |
